# Supplementary material for: Different positions of amide side chains on the benzimidazo[1,2-a]quinoline skeleton strongly influence biological activity
Source: Royal Society of Chemistry journal article supplement (doi:10.1039/c8nj00416a), 2018-01-01
Supplement: c8nj00416a1.pdf [file c8nj00416a1.pdf]

**Different positions of amide side chains on the benzimidazo[1,2-*a*]quinoline skeleton  
strongly influenced biological activity**

**Nataša Perin<sup>a</sup>, Jasna Alić<sup>a</sup>, Sandra Liekens<sup>b</sup>, Arthur Van Aerschot<sup>c</sup>, Peter Vervaeke,<sup>d</sup>  
Bharat Gadakh<sup>c</sup> and Marijana Hranjec<sup>a\*</sup>**

<sup>a</sup> Department of Organic Chemistry, Faculty of Chemical Engineering and Technology,  
University of Zagreb, Marulićev trg 19, P. O. Box 177, HR-10000 Zagreb, Croatia;

<sup>b</sup> Rega Institute, Department of Microbiology and Immunology, Herestraat 49, B-3000  
Leuven, Belgium;

<sup>c</sup> Rega Institute, Department of Pharmaceutical and Pharmacological Sciences, Herestraat 49,  
B-3000 Leuven, Belgium

<sup>d</sup> Rega Institute for Medical Research, Laboratory of Virology and Chemotherapy, Herestraat  
49, B-3000 Leuven, Belgium

Contents of Supplement Material:

1. Synthesis of compounds **5-16**

## General method for the synthesis of compounds 5 - 8

Solution of equimolar amounts of 2-cyanomethylbenzimidazole, corresponding aromatic aldehydes (**3** or **4**) and a few drops of piperidine in absolute ethanol, was refluxed for 2 h. Following reaction, the mixture was cooled to room temperature; the crude product was filtered off and recrystallized from ethanol.

### **(E)-2-(1H-benzimidazol-2-yl)-3-(2-chlorophenyl)acrylonitrile 5**

Compound **5** was prepared using above described method, from 2-cyanomethylbenzimidazole **1** (2.000 g, 12.74 mmol) and 2-chlorobenzaldehyde **3** (1.790 g, 12.74 mmol) in absolute ethanol (15 mL) to yield 3.380 g (95%) of light brown crystals; mp 243–245 °C;

<sup>1</sup>H NMR (600 MHz, DMSO-*d*<sub>6</sub>): δ = 13.33 (s, 1H, NH<sub>benzimid.</sub>), 8.52 (s, 1H, H<sub>arom.</sub>), 8.14 (dd, 1H, *J*<sub>1</sub> = 2.34 Hz, *J*<sub>2</sub> = 6.84 Hz, H<sub>arom.</sub>), 7.72 (bs, 1H, H<sub>arom.</sub>), 7.70 (dd, 1H, *J*<sub>1</sub> = 1.74 Hz, *J*<sub>2</sub> = 7.50 Hz, H<sub>arom.</sub>), 7.64–7.55 (m, 3H, H<sub>arom.</sub>), 7.30 (bs, 2H, H<sub>arom.</sub>); <sup>13</sup>C NMR (75 MHz, DMSO-*d*<sub>6</sub>): δ = 176.27, 147.10, 141.84, 134.28, 133.15, 131.70, 130.51, 130.21, 128.24, 115.82, 107.23; Found: C, 68.70; H, 3.60; N, 15.02. Calc. for C<sub>16</sub>H<sub>10</sub>ClN<sub>3</sub>: C, 68.60; H, 3.70; N, 15.09%.

### **(E)-2-(1H-benzimidazol-2-yl)-3-(4-cyanophenyl)acrylonitrile 6**

Compound **6** was prepared using above described method, from 2-cyanomethylbenzimidazole **1** (2.000 g, 12.74 mmol) and 4-cyanobenzaldehyde **4** (1.670 g, 12.74 mmol) in absolute ethanol (15 mL) to yield 2.873 g (84%) of light brown powder; mp 290–291 °C;

<sup>1</sup>H NMR (300 MHz, DMSO-*d*<sub>6</sub>): δ = 13.21 (s, 1H, H<sub>benzimid.</sub>), 8.40 (s, 1H, H<sub>arom.</sub>), 8.11 (d, 2H, *J* = 8.64 Hz, H<sub>arom.</sub>), 8.04 (d, 2H, *J* = 8.52 Hz, H<sub>arom.</sub>), 7.68 (bs, 1H, H<sub>arom.</sub>), 7.63 (d, 1H, *J* = 7.70 Hz, H<sub>arom.</sub>), 7.27 (bs, 2H, H<sub>arom.</sub>); <sup>13</sup>C NMR (75 MHz, DMSO-*d*<sub>6</sub>): δ = 147.28, 147.27, 143.68, 137.48, 133.48 (2C), 130.42 (2C), 118.79, 124.55, 123.18, 119.20, 118.79, 116.07, 135.58, 112.09, 105.99; Found: C, 75.54; H, 3.73; N, 20.73. Calc. for C<sub>17</sub>H<sub>10</sub>N<sub>4</sub>: C, 75.62; H, 3.70; N, 20.68%.

### **(E)-4-(2-(1H-benzimidazol-2-yl)vinyl)benzonitrile 7**

Heating a mixture of equimolar amounts (37.81 mmol) of 4-cyanobenzaldehyde **4** and 2-methylbenzimidazole **2** in a sealed tube at 200 °C and recrystallization from methanol gave 6.60 g (71%) of yellow powder; mp 220–221 °C;

<sup>1</sup>H NMR (300 MHz, DMSO-*d*<sub>6</sub>): δ = 12.72 (s, 1H, NH), 7.85 (bs, 4H, H<sub>arom.</sub>), 7.69 (d, 1H, *J* = 16.47 Hz, H<sub>etenil.</sub>), 7.54 (d, 1H, *J* = 6.99 Hz, H<sub>arom.</sub>), 7.49 (d, 1H, *J* = 6.90 Hz, H<sub>arom.</sub>), 7.39 (d, 1H, *J* = 16.50 Hz, H<sub>etenil.</sub>), 7.26–7.11 (m, 2H, H<sub>arom.</sub>);

$^{13}\text{C}$  NMR (75 MHz, DMSO- $d_6$ ):  $\delta$  = 161.43, 150.66, 140.90, 133.28 (2C), 132.82, 131.15, 130.45, 128.17 (2C), 123.42, 122.29, 121.71, 119.38, 119.32, 114.71; Found: C, 78.35; H, 4.52; N, 17.13. Calc. for  $\text{C}_{16}\text{H}_{11}\text{N}_3$ : C, 78.25; H, 4.60; N, 17.15%.

### **Benzimidazo[1,2-*a*]quinoline-6-carbonitrile 8**

Compound **5** (3.000 g, 10.74 mmol) was dissolved in sulfolane (8 mL) and reaction mixture was heated for 30 min at 280 °C. The cooled mixture was poured into water (20 mL) and the resulting product was filtered off and recrystallized from ethanol to obtain a brown powder (1.682 g, 64%); mp 256–258 °C;

$^1\text{H}$  NMR (300 MHz, DMSO- $d_6$ ):  $\delta$  = 8.77 (d, 1H,  $J$  = 8.640 Hz,  $\text{H}_{\text{arom.}}$ ), 8.74 (s, 1H,  $\text{H}_{\text{arom.}}$ ), 8.66 (d, 1H,  $J$  = 8.10 Hz,  $\text{H}_{\text{arom.}}$ ), 8.06 (d, 1H,  $J$  = 7.44 Hz,  $\text{H}_{\text{arom.}}$ ), 7.95 (d, 1H,  $J$  = 8.00 Hz,  $\text{H}_{\text{arom.}}$ ), 7.93 (t, 1H,  $J$  = 8.10 Hz,  $\text{H}_{\text{arom.}}$ ), 7.59 (t, 1H,  $J$  = 7.44 Hz,  $\text{H}_{\text{arom.}}$ ), 7.55–7.51 (m, 2H,  $\text{H}_{\text{arom.}}$ ),  $^{13}\text{C}$  NMR (75 MHz, DMSO- $d_6$ ):  $\delta$  = 144.44, 143.74, 140.67, 135.80, 133.65, 131.21, 125.19, 123.64, 121.20, 120.26, 115.97, 115.38, 114.86; Found: C, 79.00; H, 3.73; N, 17.27. Calc. for  $\text{C}_{16}\text{H}_9\text{N}_3$ : C, 79.10; H, 3.65; N, 17.25%.

### **General method for the synthesis of compounds 9 and 10**

Solutions of respectively (*E*)-2-(1*H*-benzimidazol-2-yl)-3-(4-cyanophenyl)acrylonitrile **6** in ethanol ( $c = 2.22 \times 10^{-3} \text{ mol dm}^{-3}$ ) and (*E*)-4-(2-(1*H*-benzimidazol-2-yl)vinyl)benzocarbonitrile **7** in ethanol ( $c = 4.08 \times 10^{-3} \text{ mol dm}^{-3}$ ) were irradiated at room temperature with 400 W, high-pressure mercury lamp using a Pyrex filter for 12–20 h, until the UV spectra showed that the reaction of photochemical dehydrocyclization was completed. The solutions were concentrated under reduced pressure and resulting product was filtered off.

### **Benzimidazo[1,2-*a*]quinoline-2,6-dicarbonitrile 9**

Yield 0.146 g (31%) of light brown crystals; mp >300 °C;  $^1\text{H}$  NMR (300 MHz, DMSO- $d_6$ ):  $\delta$  = 8.99 (s, 1H,  $\text{H}_{\text{arom.}}$ ), 8.75 (d, 1H,  $J$  = 8.34 Hz,  $\text{H}_{\text{arom.}}$ ), 8.73 (s, 1H,  $\text{H}_{\text{arom.}}$ ), 8.17 (d, 1H,  $J$  = 8.10 Hz,  $\text{H}_{\text{arom.}}$ ), 7.93 (d, 1H,  $J$  = 8.10 Hz,  $\text{H}_{\text{arom.}}$ ), 7.89 (d, 1H,  $J$  = 7.86 Hz,  $\text{H}_{\text{arom.}}$ ), 7.53–7.47 (m, 2H,  $\text{H}_{\text{arom.}}$ );  $^{13}\text{C}$  NMR (75 MHz, DMSO- $d_6$ ):  $\delta$  = 144.10, 143.97, 139.97, 135.80, 132.50, 130.83, 128.47, 126.03, 124.82, 124.78, 120.85, 119.96, 118.44, 115.74, 115.35, 115.28, 104.62; Found: C, 76.11; H, 3.01; N, 20.88. Calc. for  $\text{C}_{17}\text{H}_8\text{N}_3$ : C, 76.08; H, 3.10; N, 20.82%.

### **Benzimidazo[1,2-*a*]quinoline-2-carbonitrile 10**

Yield 0.123g (31%) of yellow powder; mp 210–212 °C;  $^1\text{H}$  NMR (300 MHz, DMSO- $d_6$ ):  $\delta$  = 9.13 (s, 1H,  $\text{H}_{\text{arom.}}$ ), 8.86 (d, 1H,  $J$  = 8.88,  $\text{H}_{\text{arom.}}$ ), 8.27 (d, 1H,  $J$  = 8.13,  $\text{H}_{\text{arom.}}$ ), 8.01–7.94 (m,

3H, H<sub>arom.</sub>), 7.82 (d, 1H,  $J = 9.51$ , H<sub>arom.</sub>), 7.60–7.53 (m, 2H, H<sub>arom.</sub>); <sup>13</sup>C NMR (75 MHz, DMSO-*d*<sub>6</sub>):  $\delta = 153.26, 145.59, 132.38, 131.09, 129.43, 127.93, 126.83, 125.20, 123.87, 120.52, 119.68, 119.22, 118.98, 115.52, 112.40, 109.52$ ; Found: C, 79.00; H, 3.73; N, 17.27. Calc. for C<sub>16</sub>H<sub>9</sub>N<sub>3</sub>: C, 78.70; H, 3.80; N, 17.50%.

### **General method for the synthesis of compounds 11–13**

2 N solution of sulfuric acid and benzimidazo[1,2-*a*]quinolines **8–10** was refluxed for 24 h. Cooled reaction mixture was poured into ice, and resulting product was filtered off.

#### **Benzimidazo[1,2-*a*]quinoline-6-carboxylic acid 11**

Compound **11** was prepared using above described method, from benzimidazo[1,2-*a*]quinoline-6-carbonitrile **8** (2.000 g, 8.22 mmol) and 2 N aqueous solution of sulfuric acid (11.8 mL) to yield 1.466 g (84%) of yellow powder; mp 290–293 °C;

<sup>1</sup>H NMR (300 MHz, DMSO-*d*<sub>6</sub>):  $\delta = 9.23$  (s, 1H, H<sub>arom.</sub>), 9.14 (d, 1H,  $J = 8.61$  Hz, H<sub>arom.</sub>), 9.04 (d, 1H,  $J = 8.13$  Hz, H<sub>arom.</sub>), 8.53 (d, 1H,  $J = 7.38$  Hz, H<sub>arom.</sub>), 8.23–8.16 (m, 2H, H<sub>arom.</sub>), 7.89 (t, 1H,  $J = 7.70$  Hz, H<sub>arom.</sub>), 7.84–7.74 (m, 2H, H<sub>arom.</sub>); <sup>13</sup>C NMR (75 MHz, DMSO-*d*<sub>6</sub>):  $\delta = 164.70$  (2C), 135.48 (2C), 135.29, 132.92 (2C), 129.26, 127.87, 127.36, 125.85, 123.08 (2C), 117.36, 117.29, 116.60; Found: C, 73.27; H, 3.84; N, 10.68. Calc. for C<sub>16</sub>H<sub>10</sub>N<sub>2</sub>O<sub>2</sub>: C, 73.37; H, 3.80; N, 10.72%.

#### **Benzimidazo[1,2-*a*]quinoline-2,6-dicarboxylic acid 12**

Compound **12** was prepared using above described method, from benzimidazo[1,2-*a*]quinoline-2,6-dicarbonitrile **9** (0.200 g, 0.75 mmol) and 2 N aqueous solution of sulfuric acid (4.3 mL) to yield 0.171 g (75%) of yellow powder; mp 297–299 °C;

<sup>1</sup>H NMR (300 MHz, DMSO-*d*<sub>6</sub>):  $\delta = 13.93$  (bs, 2H, COOH), 9.11 (s, 1H, H<sub>arom.</sub>), 8.77 (s, 1H, H<sub>arom.</sub>), 8.47–8.44 (m, 1H, H<sub>arom.</sub>), 8.39 (d, 1H,  $J = 8.22$  Hz, H<sub>arom.</sub>), 8.12 (d, 1H,  $J = 8.21$  Hz, H<sub>arom.</sub>), 8.07–8.04 (m, 1H, H<sub>arom.</sub>), 7.70–7.64 (m, 2H, H<sub>arom.</sub>); <sup>13</sup>C NMR (75 MHz, DMSO-*d*<sub>6</sub>):  $\delta = 167.67, 165.21, 146.84, 143.37, 136.85, 136.60, 135.13, 133.47, 131.27, 126.82, 126.34, 126.21, 125.62, 121.28, 121.04, 117.16, 115.34$ ; Found: C, 66.67; H, 3.29; N, 9.15. Calc. for C<sub>17</sub>H<sub>10</sub>N<sub>2</sub>O<sub>4</sub>: C, 66.75; H, 3.33; N, 9.10%.

#### **Benzimidazo[1,2-*a*]quinoline-2-carboxylic acid 13**

Compound **13** was prepared using above described method, from benzimidazo[1,2-*a*]quinoline-2-carbonitrile **10** (0.158 g, 0.65 mmol) and 2 N aqueous solution of sulfuric acid (1.8 mL) to yield 0.166 g (98%) of light brown powder; mp >300 °C;

$^1\text{H}$  NMR (300 MHz,  $\text{DMSO-}d_6$ ):  $\delta$  = 9.20 (s, 1H,  $\text{H}_{\text{aromat.}}$ ), 8.52 (d, 1H,  $J$  = 7.14 Hz,  $\text{H}_{\text{aromat.}}$ ), 8.27–8.22 (m, 2H,  $\text{H}_{\text{arom.}}$ ), 8.15 (d, 1H,  $J$  = 8.10 Hz,  $\text{H}_{\text{arom.}}$ ), 8.04–8.00 (m, 1H,  $\text{H}_{\text{arom.}}$ ), 7.89 (d, 1H,  $J$  = 9.51 Hz,  $\text{H}_{\text{arom.}}$ ), 7.73–7.65 (m, 2H,  $\text{H}_{\text{arom.}}$ );  $^{13}\text{C}$  NMR (75 MHz,  $\text{DMSO-}d_6$ ):  $\delta$  = 167.78, 147.72, 142.31, 135.54, 134.22, 133.63, 131.63, 131.17, 127.63, 126.83, 126.46, 125.47, 120.21, 119.08, 117.56, 115.72; Found: C, 73.27; H, 3.84; N, 10.68. Calc. for  $\text{C}_{16}\text{H}_{10}\text{N}_2\text{O}_2$ : C, 73.20; H, 3.90; N, 10.72%.

### General method for the synthesis of compounds 14–16

A mixture of corresponding carboxylic acids **11–13** and thionyl chloride in absolute toluene was refluxed for 19 h. Toluene and excess of thionyl chloride was removed under reduce pressure. The crude product was washed 3 times with absolute toluene to obtained powdered product.

#### Benzimidazo[1,2-*a*]quinoline-6-carbonyl chloride **14**

Compound **14** was prepared using above described method, from benzimidazo[1,2-*a*]quinoline-6-carboxylic acid **11** (0.500 g, 1.91 mmol), absolute toluene (20 mL) and 2.70 mL thionyl chloride to yield 0.530 g (99%) of yellow powder; mp 242–245 °C;

$^1\text{H}$  NMR (300 MHz,  $\text{DMSO-}d_6$ ):  $\delta$  = 9.40 (s, 1H,  $\text{H}_{\text{arom.}}$ ), 9.23 (d, 1H,  $J$  = 8.67 Hz,  $\text{H}_{\text{arom.}}$ ), 9.13 (d, 1H,  $J$  = 8.22 Hz,  $\text{H}_{\text{arom.}}$ ), 8.60 (dd, 1H,  $J_1$  = 1.02 Hz,  $J_2$  = 7.89 Hz,  $\text{H}_{\text{arom.}}$ ), 8.29–8.22 (m, 2H,  $\text{H}_{\text{arom.}}$ ), 7.96 (t, 1H,  $J$  = 7.58 Hz,  $\text{H}_{\text{arom.}}$ ), 7.90 (t, 1H,  $J$  = 7.92 Hz,  $\text{H}_{\text{arom.}}$ ), 7.84 (t, 1H,  $J$  = 7.13 Hz,  $\text{H}_{\text{arom.}}$ );  $^{13}\text{C}$  NMR (75 MHz,  $\text{DMSO-}d_6$ ):  $\delta$  = 164.66, 143.12, 142.09, 135.99, 135.15, 133.13, 132.61, 128.71, 128.67, 127.97, 126.61, 123.41, 117.92, 117.08, 116.19, 114.31; Found: C, 68.46; H, 3.23; N, 9.98. Calc. for  $\text{C}_{16}\text{H}_{10}\text{ClN}_2\text{O}$ : C, 68.40; H, 3.19; N, 10.03%.

#### Benzimidazo[1,2-*a*]quinoline-2,6-dicarbonyl chloride **15**

Compound **15** was prepared using above described method, from benzimidazo[1,2-*a*]quinoline-2,6-dicarboxylic acid **12** (0.295 g, 0.96 mmol), absolute toluene (20 mL) and 1.40 mL thionyl chloride to yield 0.306 g (93%) of yellow powder; mp >300 °C;

$^1\text{H}$  NMR (300 MHz,  $\text{DMSO-}d_6$ ):  $\delta$  = 9.39 (d, 1H,  $J$  = 6.90 Hz,  $\text{H}_{\text{arom.}}$ ), 9.38 (s, 1H,  $\text{H}_{\text{arom.}}$ ), 8.80–8.75 (m, 1H,  $\text{H}_{\text{arom.}}$ ), 8.68 (d, 1H,  $J$  = 8.31 Hz,  $\text{H}_{\text{arom.}}$ ), 8.36 (d, 1H,  $J$  = 8.31 Hz,  $\text{H}_{\text{arom.}}$ ), 8.26–8.23 (m, 1H,  $\text{H}_{\text{arom.}}$ ), 7.95–7.87 (m, 1H,  $\text{H}_{\text{arom.}}$ );

$^{13}\text{C}$  NMR (75 MHz, DMSO- $d_6$ ):  $\delta$  = 166.56, 164.44, 142.65, 141.53, 136.27, 135.08, 133.49, 128.93, 128.60, 127.31, 127.07, 126.03, 117.82, 116.92, 116.77, 116.27; Found: C, 59.50; H, 2.35; N, 8.16. Calc. for  $\text{C}_{17}\text{H}_8\text{Cl}_2\text{N}_2\text{O}_2$ : C, 59.40; H, 2.39; N, 8.12%.

**Benzimidazo[1,2-*a*]quinoline-2-carbonyl chloride 16**

Compound **16** was prepared using above described method, from benzimidazo[1,2-*a*]quinoline-2-carboxylic acid **13** (0.300 g, 1.14 mmol), absolute toluene (20 mL) and 0.82 mL thionyl chloride to yield 0.284 g (88%) of light brown powder; mp > 300 °C;

$^1\text{H}$  NMR (600 MHz, DMSO- $d_6$ ):  $\delta$  = 9.33 (s, 1H,  $\text{H}_{\text{arom.}}$ ), 8.70 (d, 1H,  $J$  = 8.16 Hz,  $\text{H}_{\text{arom.}}$ ), 8.60 (d, 1H,  $J$  = 9.42 Hz,  $\text{H}_{\text{arom.}}$ ), 8.43 (d, 1H,  $J$  = 8.22 Hz,  $\text{H}_{\text{arom.}}$ ), 8.28 (dd, 1H,  $J_1$  = 1.02 Hz,  $J_2$  = 8.16 Hz,  $\text{H}_{\text{arom.}}$ ), 8.12–8.10 (m, 2H,  $\text{H}_{\text{arom.}}$ ), 7.86 (t, 1H,  $J$  = 7.05 Hz,  $\text{H}_{\text{arom.}}$ ), 7.83 (t, 1H,  $J$  = 7.80 Hz,  $\text{H}_{\text{arom.}}$ );  $^{13}\text{C}$  NMR (75 MHz, DMSO- $d_6$ ):  $\delta$  = 166.28, 144.65, 136.40, 133.61, 133.31, 130.97, 129.40, 129.02, 128.15, 127.22, 126.59, 126.17, 117.10, 116.47, 115.47, 114.78; Found: C, 68.46; H, 3.23; N, 9.98. Calc. for  $\text{C}_{16}\text{H}_9\text{ClN}_2\text{O}$ : C, 68.50; H, 3.21; N, 10.01%.
